# Supplementary material
Source: Research Square preprint supplement (doi:10.21203/rs.3.rs-8612935/v1)
Supplement: Supplementary file 1 [file d0ea29b9e1c83fd2e3a49c60.xlsx]

## Sheet: Tubercular
UHID	Specimen ID (Lab Number)	AGE (YEARS)	Gender	Diagnosis	FEVER	DURATION OF FEVER (DAYS)	COUGH	DURATION OF COUGH (DAYS)	EXPECTORATION	DYSPNOEA	CHEST PAIN	AUSCULTATORY FINDINGS	CHEST X-RAY FINDINGS	ZONE	WBC	RBC	HGB	HCT	MCV	MCH	MCHC	RDW	PLT	MPV	NE	LY	MO	EO	BA	NE#	LY#	MO#	EO#	BA#	@MN-V-NE	@SD-V-NE	@MN-C-NE	@SD-C-NE	@MN-MALS-NE	@SD-MALS-NE	@MN-UMALS-NE	@SD-UMALS-NE	@MN-LMALS-NE	@SD-LMALS-NE	@MN-LALS-NE	@SD-LALS-NE	@MN-AL2-NE	@SD-AL2-NE	@MN-V-LY
3459996	4677189	55	1	1	Yes	7	Yes	7	Yes	No	No	Crepitations	Consolidation	Right lung	9.461	4.367	11.57	35.85	82.08	26.48	32.26	15	325.1	8.47	91.14	5.94	2.32	0	0.11	8.623	0.562	0.266	0	0.01	147	18.11	144	4.8	140	9.51	138	9.95	137	12.11	161	27.42	126	13.37	84
3445972	4648549	32	2	1	No	0	Yes	5	Yes	Yes	No	Crepitations	Fibrocystic changes	Left upper zone	7.894	3.452	9.39	28.82	83.5	27.21	32.59	15.69	249.8	8.89	75.25	14.72	9.01	0.18	0.84	5.941	1.162	0.711	0.014	0.066	145	16.85	145	3.94	145	9.46	137	10.33	147	10.8	171	25.81	128	12.74	92
3438450	4586557	27	2	1	Yes	8	Yes	8	Yes	No	No	Ronchi	Consolidation + pleural effusion	Right lung	9.878	2.864	6.58	20.88	72.92	22.97	31.5	22.1	480.1	7.87	71.65	11.08	14.17	1.71	1.39	7.078	1.095	1.4	0.169	0.137	155	20.18	139	7.16	127	14	122	15.57	127	16.2	154	29.99	134	15.06	92
3003089	4583091	57	1	1	No	0	Yes	8	Yes	No	No	Crepitations	Fibrocystic changes	Right upper zone	14.725	4.049	12.21	39.28	97	30.16	31.09	16.79	171.4	11.99	91.46	1.09	6.8	0.14	0.51	13.467	0.161	1.001	0.021	0.075	150	19.25	148	4.5	143	9.27	143	12.99	139	11.57	195	30.74	129	11.24	101
3437307	4582562	42	1	1	Yes	15	No	0	No	Yes	No	Crepitations	Consolidation	Left upper zone	14.99	4.028	12.04	36.12	89.68	29.9	33.34	13.74	303.6	8.11	88.08	4.05	7.73	0.09	0.05	13.202	0.608	1.159	0.014	0.008	143	17.71	147	4.35	141	10	143	11.04	136	13.8	178	36.21	125	11.38	88
3433357	4554491	33	1	1	Yes	8	Yes	8	Yes	No	No	Decreased breath sounds	Pleural effusion	Right lung	6.918	2.869	8.71	26.69	93.01	30.34	32.62	16.75	117.4	12.26	85.01	8.82	4.74	0.57	0.86	5.881	0.61	0.328	0.04	0.06	162	19.7	146	4.52	133	10.43	130	12.18	131	12.5	169	30.29	135	11.05	97
3315261	4206124	42	1	1	Yes	12	Yes	10	Yes	No	Yes	Crepitations	Consolidation	Left lung	5.7	4.08	10.7	34.4	84.3	26.3	31.3	16.4	353	7.5	84	10.9	3.6	0.9	0.6	4.8	0.6	0.2	0.1	0	137	18.17	144	6.81	132	12.97	124	14.45	134	14.48	164	30.76	143	12.21	101
3320098	4215043	23	2	1	Yes	9	Yes	8	Yes	Yes	No	Ronchi	Fibrocystic changes	Right middle + lower zone	5	5.32	10.5	35	65.8	19.7	29.9	15.6	67	9.3	64	23.7	4.4	6.5	1.4	3.2	1.2	0.2	0.3	0.1	150	18.71	150	4.23	137	10.53	131	11.05	138	13.03	175	30.06	153	12.31	94
3323880	4225878	31	2	1	No	0	Yes	7	Yes	No	No	Bronchial breath sounds	Cavitatory lesion	Left middle zone	1.8	4.69	10.6	35.6	75.9	22.7	29.9	23.4	100	11.8	77.8	16.5	5.3	0.1	0.3	1.4	0.3	0.1	0	0	142	16.95	149	5.14	143	9.68	134	11.41	145	11.18	173	28.53	144	9.54	89
3330503	4241612	40	2	1	Yes	8	Yes	8	Yes	No	Yes	Decreased breath sounds	Consolidation + pleural effusion	Left lung	13.6	4.77	10.5	34.1	71.4	22.1	30.9	18.3	317	9.1	90.5	3.1	6	0.1	0.3	12.3	0.4	0.8	0	0	151	18.82	147	4.94	142	10.73	136	12.25	143	11.99	188	28.03	151	11.08	102
3428788	4567302	35	1	1	Yes	10	Yes	10	No	No	No	Crepitations	Consolidation	Left lower zone	8.574	4.358	14.26	42.84	98.29	32.71	33.28	13.62	614.2	6.83	64.51	19.18	10.59	4.65	1.07	5.531	1.644	0.908	0.399	0.092	151	15.91	147	3.84	141	8.73	140	10.07	138	10.71	198	28.32	128	9.65	92
3426075	4545567	58	1	1	Yes	10	Yes	8	Yes	Yes	No	Crepitations	Consolidation	Right lung	7.57	2.402	7.36	23.79	99.04	30.65	30.94	14.28	201.1	8.39	80.77	11.53	7.14	0.11	0.45	6.114	0.873	0.541	0.008	0.034	156	19.06	147	4.86	135	10.23	123	12.7	139	11.34	178	26.71	137	10.27	91
3429929	4554342	35	1	1	Yes	9	No	0	No	No	Yes	Decreased breath sounds	Fibrocystic changes	Left upper zone	7.93	4.049	11.04	33.78	83.44	27.26	32.67	15.64	296.6	6.74	73.82	17.14	7.73	0.89	0.42	5.854	1.36	0.613	0.071	0.033	159	19.24	143	5.06	130	9.76	121	11.44	133	11.48	169	26.39	137	10.61	95
3429234	4554432	43	2	1	Yes	10	Yes	8	Yes	No	Yes	Decreased breath sounds	Pleural effusion	Left lung	17.649	3.134	6.89	24.42	77.92	21.97	28.2	24.07	96.3	7.66	93.72	3.61	2.45	0.01	0.21	16.54	0.637	0.432	0.002	0.038	171	21.09	141	4.15	128	10.05	122	11.73	129	12.36	177	28.01	143	11.78	84
3405064	4472336	38	2	1	No	0	Yes	8	Yes	Yes	No	Decreased breath sounds	Fibrocystic changes	Left upper zone	6.4	2.72	8.5	25.4	93.1	31.2	33.5	17.1	66	11	84.1	6.4	8	1.2	0.3	5.4	0.4	0.5	0.1	0	156	19.4	144	4.15	128	9.14	125	11.38	127	10.46	158	25.92	138	13.61	89
3394692	4437690	36	1	1	Yes	9	Yes	7	Yes	No	Yes	Bronchial breath sounds	Cavitatory lesion	left upper zone	10.9	3.99	11.9	38.7	96.8	29.8	30.8	16.2	178	8.8	86.4	5.8	7.2	0.5	0.1	9.5	0.6	0.8	0.1	0	154	20.81	145	5.69	136	12.28	133	12.14	135	15.35	161	31.98	132	13.99	86
3345874	4278344	41	1	1	Yes	12	Yes	12	No	No	No	Ronchi	Consolidation	right lower zone	11.446	4.54	11.85	36.94	81.37	26.1	32.08	14.56	536.1	6.96	60.4	23.84	14.15	1.18	0.43	6.913	2.729	1.62	0.135	0.049	148	17.18	152	3.68	152	8.37	149	9.61	150	9.81	217	26.93	141	8.92	87
2981986	3295400	42	2	1	Yes	8	Yes	8	Yes	Yes	No	Bronchial breath sounds	Cavitatory lesion	right upper zone	30.547	4.475	10.59	34.68	77.5	23.66	30.53	17.3	732.8	7.89	89.2	3.3	7.04	0.2	0.26	27.245	1.008	2.151	0.62	0.008	163	21.49	150	4.69	110	17.81	113	16.24	105	22.52	132	49.83	113	18.86	93
2983917	3308416	46	2	1	Yes	7	Yes	7	Yes	Yes	No	Ronchi	fibrocystic lesions	B/L lungs	10.4	4.23	12.4	37.6	88.8	29.2	32.9	15.9	209	8.1	84.2	3.5	9.2	2.7	0.4	8.8	0.4	1	0.3	0	153	18.22	143	5.14	129	10.24	134	11.05	120	13.45	130	24.81	143	13.73	87
2985516	3305445	37	1	1	Yes	13	Yes	10	Yes	No	No	Decreased breath sounds	pleural effusion	right lung	9.029	2.826	11.19	32.27	114.19	39.61	34.69	12.88	174.7	9.06	82.72	12.84	3.66	0.5	0.28	7.468	1.159	0.331	0.045	0.026	170	21.22	150	4.87	120	15.8	122	16.65	116	16.93	152	39.65	120	19.26	101
3005269	3448623	56	1	1	Yes	18	No	0	No	No	No	Bronchial breath sounds	fibrocystic changes	left + right upper zone	7	5.47	15.9	47.2	86.4	29.1	33.6	15.8	122	11.1	64	26.3	7.1	1.4	1.2	4.5	1.8	0.5	0.1	0.1	152	18.59	137	4.3	124	11.31	130	11.62	115	14.99	117	29.92	136	15.18	89
3009410	3373815	21	1	1	No	0	Yes	8	Yes	Yes	Yes	Decreased breath sounds	consolidation + pleural effusion	left lower zone	6.7	4.29	12.6	39.1	91.2	29.4	32.3	14.3	76	13.8	59.2	20.7	9	10.7	0.4	4	1.4	0.6	0.7	0	148	18.38	139	5.04	132	10.91	137	12.11	123	14.22	135	27.62	133	14.49	93
3045137	3470884	34	1	1	Yes	20	Yes	10	No	Yes	Yes	Decreased breath sounds	fibrocystic changes	right upper + middle zone	22.7	3.54	13.5	38.9	109.8	38	34.6	15.4	181	9.8	90.8	6.8	2.2	0.1	0	20.6	1.5	0.5	0	0	161	21.23	144	4.85	136	10.27	136	11.67	132	12.7	143	24.2	143	15.01	85
3073237	3551397	62	2	1	Yes	20	Yes	10	No	Yes	No	Decreased breath sounds	inhomogenous opacities	B/L lungs	10.4	4.271	9.85	31.67	74.15	23.07	31.11	18.93	223.7	11.29	87.97	7.43	3.88	0.05	0.67	9.15	0.772	0.403	0.006	0.07	144	17.2	146	4.84	125	14.58	126	12.96	120	19.92	166	48.73	134	11.85	94
3015534	3387008	34	1	1	Yes	15	Yes	10	Yes	No	No	Decreased breath sounds	Fibrocystic changes	B/L lungs	6.7	5.08	15.2	45.4	89.4	30	33.5	14.9	185	9	76.2	9.1	13	0.9	0.8	5.1	0.6	0.9	0.1	0.1	153	17.96	147	4.6	134	10.29	141	10.47	123	13.98	131	28.21	136	15.01	94
3237319	4002047	37	1	1	Yes	9	No	0	No	No	No	Decreased breath sounds	fibrocystic changes	right upper + left upper zone	11.9	4.88	11.5	36.1	74	23.6	31.9	16.4	473	7	69.5	18.8	9.2	2	0.5	8.3	2.2	1.1	0.2	0.1	152	17.8	137	3.97	136	9.79	126	11.6	138	11.33	161	23.09	145	9.39	99
2990197	3317794	49	1	1	Yes	16	Yes	12	Yes	Yes	No	Bronchial breath sounds	Cavitatory lesion	right upper zone	8.651	4.024	9.57	30.46	75.7	23.79	31.43	16.13	462.4	7.83	80.22	12.78	5.62	0.92	0.46	6.94	1.105	0.486	0.08	0.04	146	16.6	156	4.23	119	16.09	115	16.66	119	17.35	147	38.25	110	17.08	86
3043540	3466264	65	2	1	Yes	20	Yes	15	Yes	Yes	No	Bronchial breath sounds	fibrocystic changes	right upper zone	25.7	3.87	9.9	31.7	81.9	25.7	31.4	22.3	81	9.3	95.6	1.7	2.7	0	0	24.6	0.4	0.7	0	0	195	24.67	139	3.5	129	10.13	132	15.53	122	13.81	145	30.1	152	16.57	71
3082665	3577896	28	1	1	Yes	21	Yes	15	Yes	Yes	Yes	Crepitations	Consolidation	left lower zone	4.4	4.81	9.1	29.7	61.7	19	30.8	19.9	173	8.2	96	2.5	1.5	0	0	4.2	0.1	0.1	0	0	163	21.08	141	4.59	114	12.53	114	14.23	109	15.35	126	26.2	140	16.15	78
3083455	3580893	55	2	1	Yes	10	Yes	8	No	No	No	Bronchial breath sounds	fibrocystic changes	left upper zone	16.2	4.33	7.3	25.9	60	16.9	28.1	23	896	8.6	78.7	5.2	12.8	0.2	3.1	12.7	0.8	2.1	0	0.5	147	22.18	139	5.16	116	15.13	116	15.88	111	19.29	114	33.1	136	16.21	85
3081915	3580095	31	2	1	Yes	8	Yes	8	Yes	No	No	Ronchi	Cavitatory lesion	right upper zone	7.2	4.3	10.3	32	74.4	24	32.3	17.3	472	7.8	65.2	20.2	10.4	3.1	1.1	4.7	1.5	0.8	0.2	0.1	154	17.83	140	4.92	119	14.42	121	13.2	113	19.61	121	33.49	141	14.14	91
3088021	3595324	27	1	1	Yes	10	No	0	No	Yes	No	Decreased breath sounds	pleural effusion	right lung	10.2	4.37	12.1	37.8	86.5	27.7	32.1	15.6	520	6.7	70	12.2	16.3	1.1	0.4	7.1	1.2	1.7	0.1	0	146	20.17	139	4.3	121	12.5	119	14.76	118	14.49	132	25.8	129	14.37	91
3101693	3625817	63	1	1	Yes	7	Yes	7	Yes	Yes	Yes	Crepitations	consolidation	right upper zone	12.4	4.45	11.2	33.8	76.1	25.1	33	17.7	611	6.6	78.9	5	15.9	0	0.2	9.8	0.6	2	0	0	149	18.28	143	5.37	141	10.65	141	9.57	136	14.22	148	27.55	143	11.11	88
3099678	3626592	22	2	1	No	0	Yes	7	Yes	No	No	Decreased breath sounds	pleural effusion	right lung	11.345	5.149	13.09	41.91	81.38	25.43	31.24	13.22	377.6	8.12	72.65	20.11	6.19	0.81	0.24	8.242	2.281	0.702	0.092	0.027	164	18.24	145	4.42	140	9.55	140	12.38	136	11.84	189	31.82	136	11.37	88
3101001	3653800	36	1	1	Yes	12	Yes	10	Yes	No	Yes	Decreased breath sounds	fibrocystic changes	left lung	4.948	4.103	9.96	30.39	74.09	24.29	32.78	26.81	284.6	7.68	74.51	12.85	7.25	4.03	1.36	3.687	0.636	0.359	0.199	0.067	144	19.36	154	5.74	142	14.53	138	17.26	141	16.27	187	35.76	125	13.4	83
3113715	3653589	43	1	1	Yes	15	Yes	12	Yes	Yes	No	Decreased breath sounds	Destroyed lung	left lung	6.595	4.724	12.43	36.73	77.75	26.31	33.84	16.17	326.9	7.83	78.71	9.79	11.08	0.05	0.37	5.191	0.646	0.731	0.003	0.024	138	13.93	155	4.67	144	9.12	138	10.59	146	11.23	191	29.55	123	8.55	87
3315261	4211295	40	1	1	Yes	8	No	0	No	No	No	Decreased breath sounds	consolidation + pleural effusion	right lower zone	9.6	4.21	11.2	35.1	83.5	26.5	31.8	17.1	306	7.7	93.4	3	3.1	0	0.5	9	0.3	0.3	0	0.1	144	19.46	142	5.14	125	11.48	121	13.09	124	13.85	154	31.04	145	12.1	95
3320098	4225894	73	1	1	Yes	10	Yes	8	Yes	No	No	Ronchi	fibrocystic changes	right middle zone	7.7	3.87	7.7	24.3	62.7	19.9	31.8	15.2	224	8.3	66.4	16.1	11.4	5.3	0.8	5.1	1.2	0.9	0.4	0.1	151	21.46	146	6.1	140	10.79	138	13.99	138	12.52	167	33.62	153	13.83	91
3445792	4648549	52	2	1	Yes	8	Yes	8	Yes	Yes	Yes	Bronchial breath sounds	consolidation	right lower zone	7.894	3.452	9.39	28.82	83.5	27.21	32.59	15.69	249.8	8.89	75.25	14.72	9.01	0.18	0.84	5.941	1.162	0.711	0.014	0.066	145	16.85	145	3.94	145	9.46	137	10.33	147	10.8	171	25.81	128	12.74	92
3459996	4677189	66	1	1	No	0	Yes	8	Yes	No	No	Decreased breath sounds	fibrocystic changes	left middle zone	9.461	4.367	11.57	35.85	82.08	26.48	32.26	15	325.1	8.47	91.14	5.94	2.81	0	0.11	8.623	0.562	0.266	0	0.01	147	18.11	144	4.8	140	9.51	138	9.95	137	12.11	161	27.42	126	13.37	84
3463817	4692351	41	1	1	Yes	9	Yes	8	Yes	No	No	Ronchi	consolidation	right lower zone	7.509	5.656	11.01	36.43	64.41	19.46	30.21	17.72	155	16.82	82.09	10.06	5.74	1.38	0.73	6.165	0.755	0.431	0.103	0.055	144	15.73	140	4.12	142	10.43	137	11.48	143	11.84	175	28.09	125	11.19	94
3496187	4828034	30	1	1	Yes	15	No	0	No	Yes	No	Bronchial breath sounds	Cavitatory lesion	left upper zone	7.018	4.432	13.35	41.85	94.42	30.12	31.9	14.22	157.6	12.67	56.48	30.38	8.12	4.27	0.75	3.964	2.132	0.57	0.3	0.053	146	16.6	142	5.17	136	9.79	134	10.7	134	11.82	157	26.29	125	14.29	88
3500910	4851646	66	2	1	Yes	15	Yes	15	Yes	Yes	No	Bronchial breath sounds	fibrocystic changes	right lung	14.059	3.747	9.21	29.22	77.99	24.58	31.51	15.57	376.1	8.55	78.87	10.53	9.93	0.15	0.52	11.088	1.481	1.396	0.021	0.074	152	20.76	144	4.58	135	11.59	138	10.49	130	15.64	144	31.67	132	16.36	87
3503919	4861848	62	2	1	Yes	20	No	0	No	Yes	Yes	Decreased breath sounds	Destroyed lung	left lung	9.704	4.225	10.24	32.24	76.31	24.23	31.75	17.86	473.6	9.99	57.45	27.64	9.46	4.47	0.98	5.575	2.683	0.918	0.434	0.095	140	19.91	144	5.18	138	10.22	134	12.1	137	11.73	153	27.01	122	14.6	89
3505844	4868678	34	1	1	Yes	12	Yes	15	Yes	No	No	Bronchial breath sounds	Cavitatory lesion	right upper zone	10.935	3.138	8.84	26.74	85.21	28.17	33.06	14.74	248.1	10.28	76.88	14.08	8.43	0.3	0.31	8.406	1.54	0.922	0.033	0.034	149	18.24	144	4.17	141	9.21	138	9.74	140	11.28	168	25.97	128	12.68	86
3513297	4904581	56	1	1	No	0	Yes	15	Yes	Yes	No	Bronchial breath sounds	fibrocystic changes	right lung	7.834	5.071	14.95	45.76	90.24	29.48	32.67	14.73	263.4	8.4	67.64	20.56	10.27	0.96	0.57	5.299	1.611	0.805	0.076	0.045	148	16.16	148	4.48	134	9.02	131	10.09	133	11.03	160	24.32	126	14.04	92
2815034	4980271	40	1	1	Yes	10	Yes	10	No	No	Yes	Decreased breath sounds	pleural effusion	left lung	13.976	2.987	7.48	23.93	80.1	25.03	31.25	19.48	441.8	9.44	86.44	7.92	3.16	1.87	0.61	12.081	1.107	0.441	0.261	0.085	165	23.33	139	5.65	133	10.86	135	12.56	127	13.04	151	26.77	131	17.24	93
3532208	4991626	59	2	1	Yes	12	Yes	10	Yes	Yes	No	Decreased breath sounds	consolidation + effusion	right lung	16.761	5.662	10.03	31.6	55.81	17.71	31.73	21.02	309.8	8.99	82.49	11.38	5.45	0.34	0.34	13.825	1.907	0.913	0.057	0.057	145	16.71	142	4.08	138	11.83	135	12.35	136	13.1	156	26.25	123	14.21	83
3483580	4782940	37	1	1	Yes	15	Yes	14	Yes	No	No	Bronchial breath sounds	fibrocystic changes	left lung	7.075	3.496	9.71	30.08	86.05	27.79	32.29	16.68	579.9	7.18	39.88	41.86	16.17	1.57	0.52	2.821	2.962	1.144	0.111	0.037	147	24.9	137	5.84	135	10.56	132	14.52	134	12.35	156	31.8	126	17.06	100
3077017	5019872	48	1	1	Yes	25	Yes	22	Yes	Yes	Yes	Crepitations	Cavitatory lesion	left upper + middle zone	4.6	3.92	11.5	35.4	90.3	29.4	32.5	13.6	173	10.2	71.1	12.6	14.6	1.4	0.3	3.3	0.6	0.7	0.1	0	145	16.31	149	5.24	126	11.7	113	14.34	131	13.08	200	31.59	125	11.12	92
3539985	5029289	71	1	1	No	0	Yes	14	Yes	Yes	No	Decreased breath sounds	Destroyed lung	right lung	8.256	3.49	9.43	29.34	84.08	27.02	32.13	14.6	343.1	9.1	77.68	12.15	9.58	0.23	0.36	6.413	1.003	0.791	0.019	0.029	153	18.01	143	4.3	139	9.45	134	10.57	139	10.85	161	21.82	130	14.83	87
3522276	5020023	44	1	1	Yes	15	Yes	14	Yes	Yes	Yes	Decreased breath sounds	pleural effusion	left lung	14.2	4.32	11.1	34.6	80	25.6	32	18.1	342	8.6	68.8	14.2	15.9	0.5	0.6	9.8	2	2.3	0.1	0.1	145	20.09	144	5.18	118	14.05	112	15.69	118	18.74	176	40.91	120	13.14	96
3537062	5015173	57	2	1	No	0	Yes	12	No	No	Yes	Ronchi	consolidation	right upper zone	10.9	3.84	10.8	33.9	88.4	28.2	31.9	15.6	471	8.1	67.2	19.7	9.6	3.1	0.4	7.3	2.1	1	0.3	0	148	18.64	146	4.49	127	11.02	115	14.55	131	12.69	204	31.85	124	11.13	92
3445167	5024936	35	2	1	Yes	22	Yes	20	Yes	Yes	No	Decreased breath sounds	pleural effusion	right lung	4.3	2.04	6.9	21.4	105.1	34	32.3	17.9	114	10.5	68.2	19.4	8.6	3.4	0.4	3	0.8	0.4	0.1	0	150	16.87	146	4.13	148	10.56	148	11.1	145	12.34	196	32.49	122	10.49	92
3451863	5059334	45	1	1	No	0	Yes	24	Yes	Yes	No	Bronchial breath sounds	fibrocystic changes	left lung	10.3	4.09	10.2	31.2	76.4	25	32.7	17	193	10.1	77.6	11.6	7.4	3.1	0.3	8	1.2	0.8	0.3	0	154	18.22	147	4.31	149	9.21	147	12.24	148	11.07	213	29.72	123	9.45	95
3555790	5108294	67	1	1	Yes	24	Yes	22	Yes	No	No	Decreased breath sounds	Destroyed lung	right lung	14.2	4.15	10.6	33.6	80.9	25.5	31.5	16.4	325	8.4	84.3	5.9	9.5	0.1	0.2	12	0.8	1.4	0	0	162	18.02	153	4.4	132	9.85	123	11.88	132	11.04	178	25.6	136	12.65	101
3551320	5087891	33	1	1	Yes	18	Yes	16	Yes	Yes	No	Bronchial breath sounds	Cavitatory lesion	left upper zone	6.7	4.17	12.3	37.1	88.8	29.5	33.2	13.7	332	8	52.9	29.3	9.7	7.2	0.9	3.5	2	0.6	0.5	0.1	153	17.78	149	5.03	127	11.49	125	12.53	122	14.56	143	30.75	132	13.71	90
3551130	5085045	29	1	1	Yes	14	Yes	12	No	No	Yes	Decreased breath sounds	pleural effusion	left lung	14.9	4.61	11	35.2	76.4	23.9	31.3	16.5	427	9.4	81.4	6.3	12	0.1	0.2	12.2	0.9	1.8	0	0	152	18.5	151	4.95	132	10.9	126	12.23	130	13.51	156	29.16	130	13.22	96
3554300	5107462	37	1	1	Yes	28	Yes	26	Yes	Yes	Yes	Bronchial breath sounds	Cavitatory lesion	left upper zone	12.2	5.31	11.5	37.3	70.3	21.7	30.9	18.8	409	10.2	82.1	12.8	3.9	0.3	0.9	10	1.6	0.5	0	0.1	144	16.46	146	4.77	142	9.77	137	12.36	142	12.05	189	29.49	118	9.92	89
3552879	5092931	54	1	1	Yes	20	Yes	18	Yes	Yes	No	Crepitations	consolidation	left middle zone	5.8	2.93	7.7	25.5	87.2	26.4	30.3	19	125	8	85.1	9.5	5.3	0	0.1	4.9	0.6	0.3	0	0	176	18.83	153	4.56	129	8.74	123	11.7	128	10.56	167	23.59	146	13.12	87
3550402	5080852	72	1	1	Yes	14	No	0	No	No	No	Bronchial breath sounds	fibrocystic changes	right middle zone	13	3.21	9.2	30.1	93.5	28.6	30.6	15.4	194	8.8	88.9	5.3	3.5	1.7	0.6	11.6	0.7	0.5	0.2	0.1	160	19.55	148	4.21	130	9.79	127	11.14	127	11.74	163	27.66	136	14.59	95
3550183	5081480	45	1	1	Yes	17	Yes	15	Yes	No	Yes	Decreased breath sounds	consolidation + effusion	left lung	11.4	3.04	10.1	30.1	98.9	33.1	33.4	13.2	105	10	92.8	3.3	3.6	0.2	0.1	10.6	0.4	0.4	0	0	178	24.87	148	4.19	125	9.8	128	12.34	117	11	156	24.66	142	16.89	87
3550941	5084401	27	1	1	Yes	12	Yes	10	Yes	No	No	Crepitations	consolidation	right lung	7.4	5.68	13	41.4	72.9	22.9	31.4	15	322	8	68.4	17.6	12.6	1.2	0.2	5.1	1.3	0.9	0.1	0	147	16.78	158	5.56	140	9.64	132	12.58	140	10.61	163	23.98	132	13.21	86
3545930	5058785	69	1	1	Yes	17	Yes	15	Yes	No	No	Bronchial breath sounds	fibrocystic changes	left lung	6.241	3.488	9.95	31.07	89.07	28.53	32.03	19.42	207.9	10.53	70.11	13.61	14.03	0.87	1.38	4.376	0.849	0.876	0.054	0.086	137	19.87	132	4.94	120	14.98	132	12.57	105	21.63	91	36.21	110	18.48	96
3546373	5060989	45	1	1	Yes	22	Yes	20	Yes	No	No	Decreased breath sounds	destroyed lung	right lung	9.322	1.461	5.23	16.46	112.7	35.83	31.79	25.05	272.2	9.03	87.12	8.17	3.34	0.63	0.74	8.121	0.762	0.311	0.059	0.069	167	20.78	132	4.16	129	10.07	136	10.21	119	14.07	127	29.81	129	17.67	98
3547197	5064597	26	1	1	Yes	18	Yes	18	Yes	No	No	Decreased breath sounds	pleural effusion	right lung	10.057	3.338	8.38	26.06	78.06	25.11	32.17	17.18	566.8	6.9	77.44	11.72	10.36	0.36	0.12	7.787	1.179	1.042	0.036	0.012	152	16.91	139	3.7	141	8.79	139	9.58	140	10.19	163	21.44	129	13.59	88
3499388	5069072	36	1	1	Yes	20	Yes	15	Yes	Yes	Yes	Crepitations	consolidation	right upper zone	8.193	3.535	9.7	30.84	87.24	27.44	31.45	15.26	95.7	9.18	85.5	5.52	8.33	0.27	0.38	7.005	0.452	0.683	0.022	0.031	143	24.17	146	6.28	147	10.96	142	12.78	147	13.5	158	30.5	121	15.03	81
3539358	5030845	53	1	1	Yes	20	Yes	20	Yes	Yes	No	Bronchial breath sounds	fibrocystic changes	right lower zone	7.997	3.865	11.4	34.35	88.86	29.48	33.18	13.85	228.3	8.08	82.18	7.35	10.05	0.14	0.28	6.572	0.588	0.804	0.011	0.022	139	16.96	142	4.4	134	10.34	125	11.52	137	12.73	158	25.22	121	14.66	90
3556416	5111705	39	1	1	Yes	21	Yes	18	Yes	Yes	No	Bronchial breath sounds	Destroyed lung	left lung	12.1	4.09	12.1	36.3	88.8	29.7	33.4	16.1	548	8.6	76.4	9	13.3	0.4	0.9	9.3	1.1	1.6	0	0.1	159	17.83	151	5.54	131	10.92	135	11.51	122	14.57	140	29.01	137	13.77	97
3556568	5113187	50	1	1	Yes	15	No	0	No	No	No	Decreased breath sounds	consolidation + effusion	right lung	10.1	4.05	11.4	34.6	85.5	28.2	33	13.7	136	12.2	70.9	12.6	16.1	0.2	0.2	7.2	1.3	1.6	0	0	154	17.23	154	4.89	139	10.14	136	11.05	136	11.95	172	26.56	134	11.93	84
3555790	5108294	23	1	1	Yes	18	Yes	18	Yes	No	No	Bronchial breath sounds	fibrocystic changes	left middle zone	14.2	4.15	10.6	33.6	80.9	25.5	31.5	16.4	325	8.4	84.3	5.9	9.5	0.1	0.2	12	0.8	1.4	0	0	162	18.02	153	4.4	132	9.85	123	11.88	132	11.04	178	25.6	136	12.65	101
3552153	5111821	44	1	1	Yes	23	Yes	21	Yes	Yes	Yes	Bronchial breath sounds	Cavitatory lesion	right upper zone	8.2	4.08	12.1	36.2	88.8	29.6	33.4	15.6	278	8.5	62.8	22.4	11.4	3.1	0.3	5.2	1.8	0.9	0.3	0	150	16.47	154	4.85	136	9.96	137	11.06	131	12	153	24.55	135	12.64	87
3556750	5113432	36	1	1	Yes	20	Yes	20	Yes	Yes	Yes	Bronchial breath sounds	Cavitatory lesion	left upper zone	14.7	3.48	9.5	30.5	87.8	27.4	31.2	17	371	9.1	84.9	4.1	9.3	1.2	0.5	12.5	0.6	1.4	0.2	0.1	159	22.21	149	7.73	130	14.91	134	13.47	121	20.04	140	39.54	134	15.59	98
3555414	5106501	54	1	1	Yes	25	Yes	22	Yes	Yes	No	Bronchial breath sounds	fibrocystic changes	left lung	13.3	4.33	13.8	40.5	93.6	31.9	34.1	12.7	157	11.5	66.7	16.1	12.8	3.7	0.7	8.9	2.1	1.7	0.5	0.1	163	20.29	155	5.4	137	11.08	140	11.51	130	14.12	155	28.82	141	14.48	88
[truncated: 55 more columns]

## Sheet: Non-tubercular
UHID	Specimen ID (Lab Number)	AGE (YEARS)	Gender	Diagnosis	FEVER	DURATION OF FEVER (DAYS)	COUGH	DURATION OF COUGH (DAYS)	EXPECTORATION	DYSPNOEA	CHEST PAIN	AUSCULTATORY FINDINGS	CHEST X-RAY FINDINGS	ZONE	WBC	RBC	HGB	HCT	MCV	MCH	MCHC	RDW	PLT	MPV	NE	LY	MO	EO	BA	NE#	LY#	MO#	EO#	BA#	@MN-V-NE	@SD-V-NE	@MN-C-NE	@SD-C-NE	@MN-MALS-NE	@SD-MALS-NE	@MN-UMALS-NE	@SD-UMALS-NE	@MN-LMALS-NE	@SD-LMALS-NE	@MN-LALS-NE	@SD-LALS-NE	@MN-AL2-NE	@SD-AL2-NE	@MN-V-LY
3314487	4589737	46	2	2	Yes	8	Yes	8	Yes	No	Yes	Crepitations	Consolidation	Left upper zone	4.434	2.284	6.51	20.81	91.11	28.49	31.27	16.57	104.5	9.76	77.86	12.19	7.96	1.73	0.26	3.452	0.541	0.353	0.077	0.012	144	18.13	153	6.03	139	11.25	127	16.06	144	12.44	169	27.11	126	11.85	92
3437989	4584125	63	1	2	Yes	7	Yes	7	Yes	No	Yes	Crepitations	Consolidation	Left middle zone	18.678	1.318	5.17	16.95	128.54	39.2	30.49	29.5	196.2	9.71	77.6	15.54	5.89	0.71	0.26	14.494	2.903	1.099	0.134	0.048	173	24.07	148	5.15	150	10.71	150	17.51	145	13.43	220	36.83	136	14.37	77
3426075	4545567	58	2	2	Yes	7	Yes	7	Yes	No	No	Crepitations	Inhomogenous opacities	Right middle + lower zone	7.57	2.402	7.36	23.79	99.04	30.65	30.94	14.28	201.1	8.39	80.77	11.53	7.14	0.11	0.45	6.114	0.873	0.541	0.008	0.034	156	19.06	147	4.86	135	10.23	123	12.7	139	11.34	178	26.71	137	10.27	91
3357399	4312699	46	1	2	No	0	Yes	7	No	Yes	No	Crepitations	Consolidation	Left lower zone	6.534	3.071	7.1	22.9	74.56	23.12	31.01	20.92	237.2	10.12	83.68	5.26	10.51	0	0.55	5.468	0.343	0.687	0	0.036	145	20.47	150	4.31	139	13.83	135	14.54	137	16.2	195	37.25	140	13.68	86
3324645	4227741	39	1	2	Yes	7	Yes	6	Yes	No	No	Crepitations	Consolidation + pleural effusion	Right lung	7.66	5.022	14.32	43.19	86.01	28.51	33.15	13.96	143.3	12.24	50.97	21.89	6.34	19.98	0.82	3.904	1.676	0.486	1.53	0.063	142	16.76	141	4.63	143	12.92	135	13.8	146	13.95	171	29.88	138	12.66	82
3111865	4225949	52	2	2	Yes	7	No	0	No	No	Yes	Crepitations	Consolidation	Right middle zone	8.645	3.68	9.46	29.05	78.93	25.7	32.56	17.38	286.4	10.46	92.45	2.45	4.84	0.07	0.19	7.993	0.212	0.418	0.006	0.016	153	18.5	127	5.7	144	9.64	138	10.68	146	12.01	183	32.62	143	10.32	83
3078952	4244316	72	2	2	No	0	Yes	6	Yes	No	No	Crepitations	Inhomogenous opacities	Right middle zone	4	4.39	12.6	38.7	88	28.6	32.5	14.9	185	11.6	45	40.9	13.4	0.1	0.6	1.8	1.6	0.5	0	0	149	19.43	142	5.36	134	11.72	135	12.71	130	14.31	153	32.02	151	12.7	90
3412904	4498983	48	2	2	No	0	Yes	7	Yes	Yes	No	Crepitations	Consolidation	Right middle zone	12.881	4.378	11.79	35.79	81.76	26.93	32.94	14.31	270	9.15	78.1	10.57	10.5	0.58	0.25	10.06	1.361	1.353	0.075	0.032	162	18.2	150	5.01	143	8.81	141	9.91	141	10.72	243	21.49	170	11.27	85
3402766	4464836	32	1	2	Yes	8	Yes	7	Yes	No	Yes	Crepitations	Consolidation	Right lung	4.821	4.055	14.39	42.43	104.63	35.48	33.91	13.42	125.4	10.24	57.42	28.95	10.03	3.13	0.47	2.769	1.396	0.483	0.151	0.023	146	15.07	150	4.29	148	9.92	144	10.27	147	12.42	238	26.85	161	10.17	89
3403545	4467186	66	2	2	Yes	9	No	0	No	Yes	No	Crepitations	Consolidation	Left lower + middle zone	1.2	3.65	10.7	32.5	88.9	29.3	32.9	17.4	41	11.8	47	38.1	13.6	1	0.3	0.6	0.5	0.2	0	0	160	19.98	148	6.58	125	10.74	127	11.3	120	14.58	134	31.71	135	16.75	89
3399970	4455683	25	2	2	Yes	7	Yes	5	Yes	No	No	Decreased breath sounds	Pleural effusion	Left lung	14.6	3.25	9.2	26.4	81.2	28.3	34.9	16.8	454	7.5	82	9.2	8	0.3	0.5	11.9	1.3	1.2	0	0.1	146	18.75	144	4.77	133	10.13	128	10.53	133	13.1	149	25.3	133	13.28	87
3272694	4158033	22	2	2	No	0	Yes	7	Yes	Yes	Yes	Crepitations	Inhomogenous opacities	right lung	2.406	4.059	10.89	35.82	88.26	26.84	30.41	30.54	134.9	9.08	45.64	40.03	11.41	1.68	1.24	1.098	0.963	0.274	0.04	0.03	136	14.7	133	5.1	142	10.61	135	15.18	143	12.98	159	28.94	134	10.47	90
2981618	3294366	38	1	2	Yes	9	No	0	No	No	No	Crepitations	Consolidation	left middle zone	25.7	4.42	11.1	37.7	85.2	25.2	29.5	17.5	475	8.7	84.3	8.5	5.9	1.1	0.2	21.7	2.2	1.5	0.3	0	159	22.97	141	5.14	130	11.99	135	15.58	122	13.19	133	28.23	139	15.53	86
3009489	3370253	55	1	2	No	0	Yes	8	No	Yes	Yes	Crepitations	Consolidation	left upper + middle zone	7.4	4.62	13.8	41.8	90.4	29.8	32.9	13.4	294	8.1	54.6	32.2	9.3	3.5	0.4	4	2.4	0.7	0.3	0	143	15.67	146	3.94	138	10.11	137	11.62	134	11.6	150	23.96	131	11.88	90
3007186	3363533	73	1	2	Yes	8	Yes	8	Yes	No	No	Decreased breath sounds	Consolidation	right middle zone	23.3	3.22	7.7	24.8	77.1	23.8	30.8	19	544	8.1	91.2	4.7	3.9	0	0.2	21.3	1.1	0.9	0	0.1	150	23.41	142	4.52	131	11.05	135	12.99	122	14	131	25.78	136	17.08	90
3032249	3432840	76	2	2	Yes	8	Yes	7	Yes	No	No	Crepitations	Consolidation	Right lung	4.435	5.018	14.99	43.22	86.13	29.87	34.68	12.08	232.9	8.5	65.37	23.56	10.57	0.04	0.46	2.899	1.045	0.469	0.002	0.02	157	17.36	147	5.68	142	9.93	147	9.53	135	13.61	199	39.28	146	10.91	86
3033811	3437453	45	1	2	No	0	Yes	7	Yes	Yes	No	Crepitations	Consolidation	left lower zone	11.3	3.52	10	30.2	86	28.3	32.9	13.6	324	11.3	80.4	7.3	9.7	1.6	1	9.1	0.8	1.1	0.2	0.1	160	21.15	133	5.81	127	12.14	130	16.31	119	15.36	135	31.12	139	15.08	101
3048221	3483533	33	1	2	Yes	7	Yes	7	No	No	Yes	Decreased breath sounds	Consolidation	Left middle zone	5.729	4.795	14.37	43.45	90.61	29.97	33.08	13.42	418.1	11.31	62.41	25.11	8.68	2.96	0.84	3.576	1.439	0.498	0.17	0.048	146	16.16	149	5.65	133	9.42	127	10.76	134	11.1	205	31.69	140	10.47	95
3049334	3483656	62	1	2	No	0	Yes	10	Yes	No	No	Decreased breath sounds	Consolidation + pleural effusion	Right middle + lower zone	15.042	4.286	9.06	31.39	73.24	21.13	28.85	27.2	264.4	8.66	89.16	3.58	6.54	0.18	0.54	13.411	0.539	0.983	0.027	0.082	154	19.43	150	6.03	129	10.81	130	12.55	123	15.2	180	36.08	142	13.04	96
3071691	3548596	49	1	2	Yes	8	Yes	7	Yes	Yes	No	Ronchi	Consolidation	Left middle zone	10.016	4.16	12.66	37.29	89.64	30.44	33.96	16.33	179.3	9.9	92.58	5.02	2.19	0.04	0.17	9.273	0.503	0.219	0.004	0.017	182	25.82	145	4.22	110	10.3	107	12.73	110	11.76	189	30.5	156	14.35	88
3072218	3548729	80	1	2	Yes	12	Yes	7	Yes	Yes	No	Decreased breath sounds	Inhomogenous opacities	left lung	13.88	3.824	13.78	40.67	106.34	36.04	33.89	14.28	158.6	12.73	86.73	9.01	3.13	0.38	0.75	12.037	1.251	0.435	0.053	0.104	157	21.59	145	10.86	134	17.15	136	16.95	130	19.8	188	43.04	144	16.28	88
3018235	3393985	34	1	2	Yes	7	No	0	No	No	Yes	Crepitations	Consolidation	Left middle zone	6.8	4.61	14.6	43.6	94.6	31.8	33.6	13.3	141	10.8	65.3	27.2	7.3	0.1	0.1	4.5	1.9	0.5	0	0	151	18.28	142	4.48	148	9.24	151	10.76	140	11.32	152	24.87	136	12.4	92
3019788	3398125	52	1	2	No	0	Yes	7	Yes	No	No	Bronchial breath sounds	Consolidation	right lower zone	3.9	5.09	15.4	45.8	90.1	30.3	33.6	13.1	180	10	48.1	43	8.3	0.1	0.5	1.9	1.7	0.3	0	0	150	18.28	140	6.62	138	12.05	144	13.06	129	14.96	138	26.9	132	15.23	91
3029442	3425080	65	2	2	No	0	Yes	7	Yes	Yes	No	Crepitations	Consolidation	left lung	5.367	4.641	14.06	41.54	89.5	30.3	33.85	13.93	58.4	15.1	73.3	19.48	6.95	0	0.27	3.934	1.046	0.373	0	0.014	157	19.34	146	5.87	148	10.36	151	11.67	142	13.61	213	35.48	143	11.72	74
3058949	3513179	77	2	2	Yes	9	Yes	8	Yes	No	No	Crepitations	Consolidation	right lung	7.067	4.172	13.77	40.64	97.42	33.01	33.88	13.48	116.4	11.52	73.84	16.81	7.82	1.14	0.39	5.219	1.188	0.552	0.08	0.028	151	16.83	149	4.58	141	9.82	137	10.83	142	11.92	209	30.08	140	9.35	90
3061505	3519436	32	1	2	Yes	8	No	0	No	Yes	Yes	Crepitations	Consolidation	Right middle + lower zone	3.5	5.1	15	43.4	85.2	29.5	34.6	12.9	180	7.8	72.4	16.8	10.5	0.1	0.2	2.5	0.6	0.4	0	0	143	17.42	142	5.32	138	11.9	133	13.83	137	13.92	154	29.56	129	11.86	94
3062094	3521209	56	2	2	Yes	8	Yes	7	Yes	No	No	Ronchi	Consolidation	left lower zone	8.1	2.65	11	31.9	120.6	41.5	34.4	16.6	169	8.8	83.8	9.6	6.1	0	0.5	6.8	0.8	0.5	0	0	181	24.72	144	6.2	132	11.68	130	24.78	126	14.49	164	29.81	144	15.7	96
3063301	3524358	51	1	2	No	0	Yes	10	Yes	Yes	No	Bronchial breath sounds	inhomogenous opacities	B/L lower zone	7.2	4.71	14.5	42	89.3	30.8	34.5	13.2	171	9.4	86.5	9	4.3	0	0.2	6.2	0.6	0.3	0	0	158	18.64	141	4.22	134	10.27	135	11.41	129	12.23	170	27.11	137	12	95
3064915	3527252	33	1	2	Yes	7	Yes	7	No	Yes	No	Decreased breath sounds	Inhomogenous opacities	left middle zone	12.413	3.962	11.78	34.42	86.87	29.72	34.22	13.16	229.8	9.1	88.76	5.11	5.99	0.07	0.07	11.018	0.634	0.744	0.008	0.008	160	20.76	148	5.34	135	10.1	132	11.19	135	12.61	206	31.26	145	11.52	87
3055284	3502034	24	2	2	Yes	9	Yes	8	Yes	Yes	Yes	Ronchi	Consolidation	Left upper zone	6	5.16	14.1	44	85.2	27.4	32.1	14.5	232	10.2	86.2	11.4	2.2	0	0.2	5.1	0.7	0.1	0	0	147	16.95	144	4.63	141	12.91	138	13.86	138	14.81	149	28.03	133	13.84	98
3055346	3502059	42	1	2	Yes	11	Yes	7	Yes	No	No	Decreased breath sounds	Consolidation + pleural effusion	left lower zone	8.4	5.03	16	47.1	93.6	31.8	34	13.4	264	8.3	76.3	13.4	10.1	0	0.2	6.4	1.1	0.8	0	0	140	19.11	142	5.56	136	10.54	133	12.31	134	12.48	139	24.71	129	13.58	88
3055390	3502039	54	1	2	Yes	8	Yes	8	Yes	No	No	Crepitations	Consolidation	right middle zone	12.3	3.91	11.6	35.6	91.1	29.8	32.7	14	172	12.2	90.2	5.8	4	0	0	11.1	0.7	0.5	0	0	150	18.74	146	4.14	141	10.35	138	11.05	138	11.96	151	25.05	134	13.08	92
3055396	3502097	73	1	2	Yes	8	Yes	7	No	Yes	Yes	Crepitations	Consolidation	Right middle + lower zone	6.793	4.728	14.21	41.71	88.22	30.06	34.07	13.95	242.4	8.81	71.42	19.37	8.36	0.4	0.45	4.851	1.316	0.568	0.027	0.031	137	15.68	150	4.13	134	10.27	132	10.72	132	12.17	188	32.42	138	10.33	83
3055711	3503200	66	1	2	Yes	10	Yes	8	Yes	Yes	No	Bronchial breath sounds	Consolidation	left lower zone	11.9	3.18	8.2	25.5	80.2	25.8	32.1	18.1	76	8.6	87.9	5.7	3.2	2.7	0.5	10.5	0.7	0.4	0.3	0.1	142	18.13	141	5.67	127	12.32	126	14.37	123	14.24	130	23.76	127	14.62	92
3055794	3503883	57	2	2	No	0	Yes	8	Yes	Yes	Yes	Decreased breath sounds	pleural effusion	left lung	16.96	4.176	11.13	35.2	84.3	26.65	31.62	16.05	464.4	9.62	90.46	4.7	4.27	0	0.57	15.342	0.797	0.724	0	0.097	156	23.76	144	5.71	132	10.06	139	11.42	123	13	175	32.53	142	13.36	83
3056414	3505473	33	2	2	No	0	Yes	7	No	No	No	Ronchi	Consolidation	right upper zone	16.157	4.468	13.41	39.83	89.14	30	33.66	14	173.3	9.57	91.54	7.22	1.1	0.03	0.11	14.79	1.166	0.178	0.005	0.018	164	21.18	149	5.32	139	9.6	142	10.85	134	12.39	214	30.67	142	11.18	99
3056490	3505600	45	1	2	Yes	7	Yes	7	Yes	No	No	Crepitations	Consolidation	right upper + middle zone	9.587	4.134	12.17	35.87	86.75	29.45	33.95	13.47	163.9	11.25	87.09	9.33	3.39	0	0.19	8.35	0.894	0.325	0	0.018	142	19.06	149	4.61	143	10.59	141	11.16	141	12.7	202	32.78	138	11.2	85
3056739	3506338	23	2	2	No	0	Yes	7	Yes	Yes	Yes	Crepitations	Consolidation	left middle zone	7.2	3.83	11	33	86.2	28.7	33.4	13.7	224	10.2	71.8	25.1	2.9	0	0.2	5.2	1.8	0.2	0	0	152	20.17	141	4.87	133	10.78	134	13.18	127	11.89	138	23.48	137	14.96	84
3064320	3526986	82	1	2	Yes	10	Yes	10	No	Yes	No	Bronchial breath sounds	Inhomogenous opacities	left middle + lower zone	13.681	4.593	15.53	45.09	98.18	33.82	34.45	14.84	276.5	8.44	90.86	2.44	6.61	0.01	0.08	12.429	0.334	0.904	0.002	0.011	159	21.21	152	4.65	135	11.12	129	12.88	136	13.56	221	33.57	141	12.35	82
3065480	3530960	37	2	2	Yes	7	Yes	7	Yes	No	No	Crepitations	Consolidation	left lower zone	4.265	4.669	12.56	37.86	81.08	26.9	33.18	14.38	268.3	8.18	64.27	26.12	9.34	0.14	0.13	2.741	1.114	0.399	0.006	0.005	146	17.75	147	5.29	144	10.86	142	11.76	143	12.87	204	33.71	139	10.57	94
2459954	3534534	66	2	2	Yes	7	No	0	No	Yes	No	Ronchi	Consolidation	right lower zone	6.722	3.73	11.24	33.84	90.71	30.12	33.21	15.45	211.3	9.76	67.06	20.06	11.19	0.86	0.83	4.508	1.348	0.752	0.058	0.055	140	17.13	146	5.47	132	10.62	126	12.44	133	12.59	185	31.88	135	10.6	88
3066292	3532989	27	1	2	Yes	8	Yes	7	Yes	Yes	Yes	Bronchial breath sounds	Consolidation	right lower zone	18.826	4.338	12.38	38.18	88.02	28.54	32.42	16.52	223.9	11.67	87.31	4.83	7.48	0.06	0.32	16.439	0.909	1.409	0.011	0.059	157	20.85	141	5.62	125	12.71	133	12.3	115	17.54	155	46.62	141	13.23	94
3067325	3535965	43	1	2	No	0	Yes	7	Yes	No	No	Crepitations	Consolidation	left lower zone	15.643	4.413	14.09	41.66	94.42	31.94	33.83	15.44	231.2	9.12	84.07	6.75	9	0.01	0.17	13.15	1.057	1.407	0.002	0.027	159	20.72	147	4.9	137	9.96	137	12.33	133	12.22	206	33.93	145	11.61	88
3097308	3616700	54	2	2	No	0	Yes	8	No	No	Yes	Decreased breath sounds	Consolidation + pleural effusion	right lower zone	21.52	5.086	12.11	39.34	77.35	23.82	30.8	17.54	324.6	9.29	87.46	8.73	3.63	0	0.18	18.821	1.879	0.781	0	0.038	146	17.53	150	4.35	145	9.47	146	10.28	141	12.07	186	32.22	126	10.87	82
3017281	3605621	67	1	2	Yes	9	Yes	8	Yes	Yes	No	Ronchi	Consolidation	right upper zone	6.5	3.08	9.9	28.7	93.2	32.1	34.5	15.1	180	9.2	63.1	20.5	12.7	2.8	0.9	4.1	1.3	0.8	0.2	0.1	163	21.94	143	4.97	137	10.15	139	12.15	132	11.65	149	25.73	148	13.66	85
3097102	3615895	22	1	2	No	0	Yes	7	Yes	No	No	Crepitations	Consolidation	left lower zone	6	4.74	14.3	41.9	88.5	30.2	34.1	14.7	134	10.1	67.9	23.7	7.5	0.3	0.6	4.1	1.4	0.5	0	0	148	17.93	139	6.22	139	11.01	142	11.25	131	14.41	141	26.49	138	13.73	91
3095788	3612655	32	2	2	Yes	7	Yes	7	Yes	Yes	Yes	Crepitations	Consolidation	right lower zone	13.5	4.962	13.66	42.69	86.03	27.53	32.01	14.74	151.3	12.56	82.39	9.89	7.53	0	0.19	11.122	1.335	1.017	0	0.026	157	17.99	153	5.35	150	9.84	150	11.24	147	12.21	202	33.46	133	10.37	88
3095087	3611101	65	2	2	Yes	8	Yes	7	Yes	Yes	No	Ronchi	Consolidation	left middle zone	9.886	4.368	11.04	34.87	79.83	25.27	31.66	16	334.8	7.51	89.12	7.53	3.07	0.04	0.24	8.81	0.744	0.303	0.004	0.024	158	18.39	151	5.3	137	9.57	141	10.88	130	12.8	182	35.06	132	11.42	91
3095633	3612328	47	1	2	Yes	8	No	0	No	No	Yes	Decreased breath sounds	Inhomogenous opacities	B/L lower zone	5.2	4.29	12.7	37.5	87.3	29.5	33.8	13.8	69	11.3	63.7	23.7	11.3	0.1	1.2	3.3	1.2	0.6	0	0.1	143	17.23	140	5.48	135	11.47	142	11.07	124	15.03	122	28.21	137	14.6	89
3071043	3546032	58	1	2	No	0	Yes	8	Yes	No	No	Bronchial breath sounds	Consolidation	left upper zone	7.384	4.373	13.3	39.67	90.71	30.41	33.52	12.99	108.1	14.13	70.1	23.64	5.93	0	0.33	5.177	1.745	0.438	0	0.024	144	17.21	150	4.7	141	10.78	136	11.56	142	12.78	213	32.15	134	9.22	93
3075564	3557662	28	1	2	Yes	7	Yes	7	Yes	Yes	Yes	Crepitations	Consolidation	right lower zone	13.026	5.469	15.59	44.42	81.23	28.5	35.09	13.8	204.4	9.64	89.76	5.94	3.92	0.01	0.37	11.692	0.773	0.51	0.002	0.048	141	17.77	148	5.29	138	8.96	137	10.35	136	12	190	31.19	122	10.22	88
3012663	3380852	45	2	2	Yes	8	No	0	No	No	Yes	Crepitations	Consolidation	B/L perihilar region	14.2	3.39	10.2	30.7	90.7	30.1	33.2	15.4	108	11.9	92.7	4.4	2.6	0.1	0.2	13.2	0.6	0.4	0	0	160	20.78	143	4.2	141	10.38	141	13.27	136	13.43	151	26.88	138	13.44	81
3017108	3390548	76	1	2	Yes	7	Yes	7	Yes	Yes	No	Crepitations	Consolidation	Left middle zone	21.6	3.38	9.7	30.5	90.4	28.7	31.8	14.8	146	9.7	91.6	4	4.3	0	0.1	19.8	0.9	0.9	0	0	156	22.23	143	5.44	143	9.78	147	11.83	135	13.37	147	27.5	135	15.11	92
3017509	3391894	39	1	2	Yes	7	Yes	7	Yes	Yes	No	Bronchial breath sounds	Consolidation	right lower zone	8	3.49	9.4	32.2	92.2	26.8	29	15	97	13.5	85.8	8.1	5.9	0.1	0.1	6.8	0.6	0.5	0	0	139	18.26	148	4.57	141	11.13	141	13.38	136	12.58	147	25.66	126	14.34	86
3017491	3391788	26	2	2	Yes	7	Yes	7	Yes	No	Yes	Decreased breath sounds	pleural effusion	right lung	7.8	4.26	9.4	29.7	69.7	22	31.6	19	182	9.1	76	19.3	4.4	0	0.3	5.9	1.5	0.3	0	0	154	18.22	143	4.59	143	11.21	144	12.86	137	13.01	153	24.58	138	14.3	89
3019278	3396975	41	1	2	No	0	Yes	7	No	No	No	Crepitations	Consolidation	left middle zone	13.2	4.88	12.8	40.4	82.8	26.2	31.7	15.2	161	12	92.6	3.2	4	0	0.2	12.3	0.4	0.5	0	0	133	18.7	138	4.12	125	10.64	121	14.65	122	12.72	125	26.31	120	13.64	81
3019652	3397975	43	1	2	Yes	10	Yes	7	No	No	No	Bronchial breath sounds	Consolidation	left lower zone	13.6	5.1	14.3	44.6	87.5	28	32	15.8	184	11.5	86	7.8	6	0	0.2	11.7	1.1	0.8	0	0	146	17.84	143	4.47	133	10.16	136	13.52	127	12.31	141	25.43	129	13.51	82
3073240	3551562	56	2	2	No	0	Yes	10	Yes	No	Yes	Crepitations	Consolidation	right middle zone	21.89	4.523	9.98	31.38	69.4	22.06	31.8	23.16	214	8.95	84.54	9.67	5.52	0.05	0.22	18.504	2.118	1.208	0.012	0.048	159	21.93	147	5.52	139	12.33	137	13.74	138	15.6	210	35.19	139	13.26	91
3073166	3551208	32	1	2	No	0	Yes	8	Yes	Yes	No	Crepitations	Consolidation	right upper zone	5.483	5.732	17.67	51.34	89.56	30.82	34.41	13.31	170.4	7.89	71.49	15.73	12.52	0.06	0.2	3.92	0.863	0.686	0.003	0.011	152	17.62	150	5.54	141	9.94	141	10.72	138	12.22	207	31.38	140	10.46	91
3070887	3545776	44	2	2	Yes	9	Yes	8	Yes	Yes	Yes	Crepitations	Consolidation	left middle zone	39.189	3.629	10.62	32.77	90.31	29.27	32.41	14.55	263	10.31	91.91	1.98	5.79	0.02	0.3	36.022	0.777	2.269	0.006	0.116	142	19.41	149	4.11	124	11.61	122	12.53	121	14.77	178	35.14	130	10.96	85
3060166	3516059	54	1	2	Yes	8	Yes	7	Yes	No	No	Bronchial breath sounds	Consolidation	left middle + lower zone	8.215	3.908	11.08	32.79	83.9	28.35	33.79	14.46	104.5	12.39	86.36	6	7.47	0.04	0.13	7.094	0.493	0.614	0.004	0.011	150	18.46	148	4.73	146	9.77	145	10.6	145	11.66	209	31.82	138	10.08	91
3007186	3363533	74	1	2	No	0	Yes	7	Yes	Yes	Yes	Crepitations	Consolidation	right middle zone	23.3	3.22	7.7	24.8	77.1	23.8	30.8	19	544	8.1	91.2	4.7	3.9	0	0.2	21.3	1.1	0.9	0	0.1	150	23.41	142	4.52	131	11.05	135	12.99	122	14	131	25.78	136	17.08	90
3007680	3365115	31	1	2	Yes	7	Yes	7	Yes	Yes	No	Decreased breath sounds	pleural effusion	right lung	15.1	4.22	9.7	30.7	72.6	23	31.6	18.7	548	7.8	83.2	8.1	8	0.2	0.5	12.6	1.2	1.2	0	0.1	163	20.75	141	4.12	126	10.85	127	13.03	120	14.43	142	28.48	139	14.03	94
3009501	3369852	67	1	2	Yes	10	No	0	No	No	Yes	Ronchi	Consolidation	left middle zone	14.8	3.75	10.4	33.5	89.2	27.8	31.2	19.3	359	8.7	77.5	14.6	7	0.4	0.5	11.5	2.2	1	0.1	0.1	153	20.53	138	4.32	135	10.88	137	15.42	128	13.87	144	29.77	135	13.79	92
3011203	3375392	60	1	2	Yes	7	Yes	7	Yes	No	No	Crepitations	Consolidation	left lower zone	6.4	4.36	12.4	36	82.6	28.5	34.5	14.4	241	10.4	66.9	14.9	11.8	6.4	0	4.3	0.9	0.8	0.4	0	140	18.74	102	55.14	137	11.48	136	10.91	133	14.45	133	22.73	132	12.3	82
3012163	3377728	21	2	2	No	0	Yes	7	Yes	Yes	No	Crepitations	Consolidation	left upper zone	21.1	4.29	10.9	34	79.1	25.4	32.1	16.1	267	9.3	89	5.6	4.6	0.6	0.2	18.8	1.2	1	0.1	0	161	20.62	139	5.18	135	12.99	141	15.58	125	18.97	134	38.03	141	14.54	89
1983028	3385546	45	2	2	Yes	8	Yes	7	No	No	No	Crepitations	Consolidation	right middle zone	4.8	4.17	9.8	31	74.3	23.6	31.7	18.6	276	7.8	68.6	19.1	9.5	2.4	0.4	3.3	0.9	0.5	0.1	0	145	17.05	140	4.55	135	10.67	134	10.68	131	13.54	138	25.31	134	13.07	89
3015007	3385507	40	1	2	Yes	10	Yes	8	Yes	Yes	Yes	Crepitations	Consolidation	left lower zone	8.1	3.56	9.1	29.2	82.2	25.6	31.2	18.6	552	8.3	64.7	19.1	14.1	1.4	0.7	5.3	1.6	1.1	0.1	0.1	144	15.72	142	4.38	135	11.66	134	11.53	131	15.59	144	31.45	131	11.96	88
3018294	3394376	44	2	2	No	0	Yes	7	Yes	Yes	No	Bronchial breath sounds	Consolidation	B/L middle zone	19.7	4.3	10.1	32.7	76	23.6	31	18	506	8.3	72.5	16.4	10.2	0.2	0.7	14.3	3.2	2	0	0.1	164	20.52	146	4.34	138	8.74	139	13.01	133	10.75	153	23.26	140	13.71	92
3018190	3394068	53	2	2	No	0	Yes	7	Yes	No	Yes	Crepitations	Consolidation	right upper zone	14.7	3.81	9.4	30.6	80.3	24.7	30.7	19.8	468	8.2	90.8	3.6	4.1	0	1.5	13.4	0.5	0.6	0	0.2	148	22.39	139	5.38	127	11.45	130	12.48	120	15.64	130	31.94	131	15.69	84
3022001	3404331	33	1	2	Yes	8	Yes	7	Yes	No	No	Crepitations	Consolidation	left upper zone	15.4	4.85	13.4	43.1	88.8	27.7	31.1	17.8	357	8.2	87.6	8.8	3.5	0	0.1	13.5	1.4	0.5	0	0	146	21.45	141	4.85	136	10.68	136	12.98	131	13.22	137	27.32	130	14.99	92
3022272	3404405	29	1	2	Yes	9	Yes	8	Yes	No	No	Crepitations	Consolidation	right lower zone	10	2.13	5.2	17	79.5	24.5	30.9	26.4	56	9.4	73.2	19.9	5.5	1.3	0.1	7.3	2	0.6	0.1	0	179	24.45	142	4.9	133	10.41	133	19.03	128	12.3	151	23.02	148	18.29	76
3033105	3434990	54	1	2	Yes	10	No	0	No	Yes	Yes	Bronchial breath sounds	Consolidation	right middle zone	11.891	3.973	12.34	36.06	90.76	31.06	34.22	13.55	392.8	8.74	58.03	27.92	8.56	4.66	0.83	6.9	3.32	1.018	0.555	0.098	147	18.7	147	6.54	141	11.82	143	12.15	136	15.04	204	38.12	133	11.33	96
3033283	3441835	83	2	2	Yes	8	Yes	7	Yes	Yes	No	Decreased breath sounds	pleural effusion	right lung	8.218	3.677	11.09	31.72	86.26	30.15	34.95	13.22	639.9	6.95	65.15	26.06	8.13	0.19	0.47	5.354	2.142	0.668	0.016	0.039	143	16.36	144	4.68	137	10.32	135	12.01	135	12.57	192	33.87	137	10	89
3034271	3440942	47	2	2	No	0	Yes	8	Yes	No	No	Crepitations	Consolidation	Right middle + lower zone	13.431	3.831	10.02	30.32	79.15	26.15	33.04	15.69	560.3	7.53	71.65	16.04	8.7	3.31	0.3	9.624	2.155	1.168	0.444	0.04	163	19.82	145	4.22	149	8.63	149	9.93	146	10.68	228	29.74	144	9.91	94
2889028	3462491	34	1	2	Yes	7	Yes	7	Yes	No	No	Crepitations	Consolidation	left middle zone	9.822	5.206	15.94	45.2	86.82	30.63	35.27	12.41	190.2	7.78	81.06	9.37	4.64	4.79	0.14	7.962	0.92	0.456	0.47	0.014	137	16.68	145	4.4	138	10.1	141	10.93	133	12.81	185	33.21	135	11.05	85
3043572	3466509	22	2	2	Yes	7	Yes	7	Yes	Yes	Yes	Crepitations	Consolidation	right upper zone	9.6	4.41	12.7	38.2	86.5	28.8	33.3	14.2	231	10.2	93.2	3.5	3.2	0	0.1	8.9	0.3	0.3	0	0	143	16.28	147	3.85	137	9.87	134	10.97	135	11.9	145	24.44	130	12.13	83
3046837	3476347	78	2	2	Yes	8	Yes	7	No	No	No	Crepitations	Consolidation	left lung	9.916	3.877	11.28	34.44	88.83	29.1	32.77	16.83	446.2	6.72	72.64	19.64	5.85	0.84	1.03	7.204	1.947	0.58	0.083	0.102	151	20.05	145	10.32	134	16.36	131	16.58	133	19.48	187	42.63	141	14.79	92
3045241	3471743	23	1	2	Yes	8	No	0	No	No	Yes	Crepitations	Consolidation	Right middle + lower zone	19.4	4.23	12.1	36.5	86.3	28.6	33.2	17	516	0	89	6	4.4	0	0.6	17.2	1.2	0.9	0	0.1	143	18.7	143	4.85	125	12.5	128	12.08	118	17.51	123	30.73	127	15	85
3058006	3510152	77	2	2	Yes	8	Yes	8	Yes	No	No	Crepitations	Consolidation	left lower zone	21.8	3.57	8.4	27.6	77.3	23.6	30.5	19.2	346	7.7	89.2	5.5	5.1	0	0.2	19.4	1.2	1.1	0	0	164	20.27	140	3.87	131	10.38	125	12.85	130	12.26	154	23.92	142	12.61	96
3046797	3500764	54	2	2	No	0	Yes	10	Yes	Yes	No	Crepitations	Consolidation	left middle zone	6.136	4.456	10.77	33.6	75.41	24.18	32.06	14.67	208	11.09	74.11	14.74	10.71	0.14	0.3	4.548	0.904	0.657	0.009	0.019	153	18.61	153	5.41	143	10.91	140	10.39	142	14.68	204	40.74	143	10.41	87
3064306	3526935	29	1	2	Yes	7	Yes	7	No	Yes	No	Crepitations	Consolidation	left lower zone	11.267	3.486	9.58	28.12	80.67	27.48	34.06	14.15	667.3	7.06	90.32	3.68	5.44	0.06	0.5	10.177	0.414	0.613	0.006	0.057	152	18.24	149	4.43	140	9.44	135	11.61	140	11.26	201	30.36	140	10.37	90
3063653	3524701	36	1	2	Yes	7	Yes	7	Yes	No	Yes	Crepitations	Consolidation	right middle zone	6.85	4.86	13.55	39.14	80.52	27.88	34.62	14.48	150.6	9.41	94.55	4.35	0.83	0.13	0.14	6.477	0.298	0.057	0.009	0.01	159	22.24	142	5.53	116	12.75	125	12.5	104	17	134	44.37	142	13.86	85
3069312	3541297	69	1	2	Yes	9	Yes	8	Yes	No	No	Crepitations	Consolidation	right lower zone	8.426	4.386	12.23	36.7	83.66	27.88	33.33	15.01	367.4	7.1	71.12	14.87	9.98	3.62	0.41	5.993	1.253	0.841	0.305	0.034	150	16.13	151	4.03	141	8.9	136	10.08	142	10.48	213	27.73	142	8.6	92
3058300	3511395	45	1	2	No	0	Yes	8	Yes	No	No	Ronchi	Consolidation	left middle zone	10.113	6.33	11.27	35.82	56.59	17.81	31.47	17.76	305.9	8.8	70.85	18.29	8.76	1.3	0.8	7.164	1.85	0.886	0.131	0.081	144	16.9	150	5.1	126	14.11	129	12.26	121	19.25	165	45.91	138	12.11	91
3495831	4825759	24	1	2	Yes	12	Yes	8	Yes	Yes	Yes	Crepitations	Consolidation	left upper zone	10.076	4.327	11.89	37.03	85.56	27.49	32.12	18.02	210.9	9.74	79.46	9.85	9.65	0.88	0.16	8.006	0.993	0.972	0.089	0.016	146	17.11	145	4.81	140	10.69	138	10.36	138	13.97	153	26.2	129	13.87	80
3476036	4825858	58	1	2	Yes	9	Yes	8	Yes	No	Yes	Crepitations	consolidation	right middle zone	14.597	3.252	8.12	25.66	78.88	24.97	31.65	19.71	309.3	8.38	81.12	9.85	8.58	0.05	0.4	11.842	1.437	1.253	0.007	0.058	144	18.3	143	4.24	135	10.27	131	12.21	135	11.69	159	24.71	125	14.29	95
3497441	4832365	43	1	2	No	0	Yes	8	Yes	No	No	Decreased breath sounds	consolidation + pleural effusion	right lower zone	8.429	5.302	13.09	41.36	78.02	24.69	31.64	18.25	279.6	8.2	74.05	14.64	7.35	2.24	1.72	6.242	1.234	0.619	0.189	0.145	137	17.59	138	3.95	125	10.54	118	11.96	127	13.05	142	23.62	122	14.08	92
3454940	4836221	70	1	2	Yes	7	Yes	6	No	Yes	No	Decreased breath sounds	pleural effusion	left lung	14.39	3.673	10.72	32.26	87.83	29.19	33.23	13.38	212.9	7.18	79.28	7.24	12.82	0.35	0.31	11.41	1.041	1.844	0.05	0.044	140	18.6	143	4.86	134	10.77	133	10.41	131	14.28	146	27.77	125	14.91	84
3498835	4838470	45	1	2	Yes	9	Yes	9	Yes	Yes	No	Crepitations	consolidation	right middle zone	7.448	4.206	13.49	39.5	93.92	32.07	34.15	15.86	131.7	11.46	83.08	9.12	7.24	0.49	0.07	6.188	0.679	0.54	0.036	0.005	150	18.67	148	4.56	141	9.51	143	10.28	137	11.9	161	27.51	126	13.92	86
3275517	4838854	62	1	2	Yes	8	No	0	No	No	Yes	Crepitations	consolidation	left upper zone	14.686	2.83	8.92	27.87	98.5	31.53	32.01	16.28	216.7	12.12	91.29	3.26	5.37	0.02	0.06	13.408	0.478	0.789	0.002	0.009	160	19.75	144	4.33	138	8.34	141	8.62	133	10.83	157	24.36	132	14.24	86
3479698	4842823	55	2	2	Yes	10	Yes	8	Yes	No	No	Ronchi	consolidation	left middle zone	8.823	3.564	11.1	34.96	98.1	31.14	31.75	16.38	108	10.39	60.56	30.68	7.47	0.17	1.12	5.343	2.707	0.659	0.015	0.099	145	17.78	147	5.09	129	9.78	133	10.1	123	13.54	138	29.07	121	15.83	95
3500762	4846108	39	1	2	No	0	Yes	8	Yes	No	Yes	Ronchi	consolidation	left upper zone	21.4	4.4	13.3	40.8	92.8	30.3	32.7	14.7	81	12.2	88.8	2.6	8.5	0	0.1	19	0.6	1.8	0	0	158	20.95	148	5.09	142	9.77	143	15.62	137	12.54	202	33.84	131	12.41	97
3499899	4842496	48	1	2	Yes	9	Yes	7	No	No	No	Crepitations	consolidation	right middle zone	24.23	4.13	11.69	36.7	88.86	28.29	31.84	14.06	180.6	11.01	92.98	3.03	3.95	0	0.04	22.527	0.735	0.958	0	0.01	148	18.87	140	5.01	135	9.41	139	10.14	129	12.17	151	25.04	125	15.17	87
3538394	5022143	28	2	2	Yes	8	Yes	8	No	No	No	Crepitations	consolidation	right middle zone	69.955	3.02	8.08	26.63	88.18	26.77	30.35	15.28	151.8	9.93	95.06	0.98	2.87	0.18	0.91	66.503	0.685	2.004	0.128	0.634	163	29.37	137	5.57	122	11.88	126	12.94	114	17.05	134	33.44	127	19.44	93
3539550	5027170	63	2	2	Yes	9	No	0	No	No	No	Crepitations	consolidation	right lower zone	12.659	3.958	11.06	34.73	87.75	27.94	31.85	16.88	230.4	10.1	73.85	10.04	15.85	0.06	0.2	9.35	1.271	2.006	0.007	0.025	159	20.92	140	4.82	132	10.8	135	10.68	126	14.48	146	30.86	128	16.83	90
3540047	5029970	39	2	2	Yes	8	Yes	7	Yes	No	No	Bronchial breath sounds	consolidation	left lower zone	15.69	9.83	20.32	24.14	22.15	10.19	11.38	26.1	11.36	13.74	15.6	30.91	21.56	7	14	11.5	6	16.5	6.5	36	154	19.02	140	4.02	131	9.45	129	10.65	129	11.55	155	24.02	123	15.69	91
3539595	5030275	46	1	2	Yes	7	No	0	No	No	Yes	Crepitations	consolidation	right middle zone	5.7	4.36	13	39.5	90.6	29.9	33	15.3	102	11.8	58.7	29.8	10.2	0.5	0.8	3.4	1.7	0.6	0	0	147	17.61	145	5.12	140	16.24	137	17.28	139	18.8	192	40.66	119	15.23	89
2525449	5026002	67	1	2	Yes	9	Yes	8	Yes	No	No	Ronchi	consolidation	right upper zone	10.544	3.077	8.79	26.86	87.3	28.55	32.7	14.43	139.8	11.03	92.35	5.43	1.92	0.09	0.21	9.737	0.572	0.203	0.01	0.022	142	16.96	140	4	137	9.65	133	11.14	137	11.61	170	27.32	120	13.45	85
3538959	5040857	32	1	2	Yes	7	Yes	7	No	Yes	No	Crepitations	consolidation	right lower zone	7.6	5.23	15.2	45.2	86.5	29	33.5	13.6	232	9.8	69.9	20.8	6.5	1.8	1	5.3	1.6	0.5	0.1	0.1	141	16.44	145	4.44	146	11.72	142	12.53	146	13.25	191	31.89	118	12.05	94
3533744	5000309	69	2	2	Yes	10	Yes	10	Yes	No	Yes	Crepitations	consolidation	left lower zone	10.1	2.99	8.5	25.4	85.1	28.5	33.6	15.2	154	10.4	72.6	12.3	13.3	1	0.8	7.3	1.2	1.3	0.1	0.1	146	17.06	146	4.5	117	12.08	111	14.12	117	15.16	181	35.85	122	11.39	92
2717877	5060736	80	2	2	Yes	14	Yes	12	No	No	No	Ronchi	consolidation	right lower zone	5.733	3.96	11.11	33.72	85.16	28.07	32.96	14.9	81.4	10.77	85.17	9.87	4.77	0.16	0.03	4.883	0.566	0.273	0.009	0.001	184	29.47	139	4.75	127	10.67	132	10.27	118	14.2	131	25.11	135	20.63	74
2900721	5061087	58	2	2	Yes	9	No	0	No	No	Yes	Decreased breath sounds	consolidation + effusion	right lung	15.416	3.268	9.31	27.87	85.26	28.48	33.4	14.38	88.4	10.39	74.45	14.22	8.97	2.01	0.35	11.476	2.192	1.383	0.31	0.054	163	22.59	134	3.9	131	10.41	132	11.66	127	11.96	158	26.33	127	16.84	90
3551376	5085779	45	1	2	No	0	Yes	10	Yes	No	No	Crepitations	consolidation	left middle zone	10.5	3.74	11.8	37.1	99.3	31.5	31.7	14.9	345	9.2	81.6	5.6	10.4	2	0.4	8.5	0.6	1.1	0.2	0	147	17.81	153	5.84	129	14.02	133	12.66	121	18.8	135	36.88	132	14.06	88
3241659	5091479	54	1	2	No	0	Yes	10	Yes	Yes	No	Ronchi	consolidation	right middle zone	11.7	4.3	12.9	39.5	91.8	30	32.7	15.1	141	11	92.9	2.7	4.3	0	0.1	10.9	0.3	0.5	0	0	149	18.45	156	5.47	134	10.48	126	11.83	133	12.69	161	28.28	130	14.32	92
3552926	5093619	82	2	2	No	0	Yes	8	Yes	Yes	No	Crepitations	consolidation	right lower zone	12.8	3.78	8.1	29.5	78.2	21.4	27.3	17.9	156	8.8	85.6	3.8	10.6	0	0	11	0.5	1.4	0	0	143	17.72	149	4.59	124	12.04	119	14.95	122	13.99	139	25.45	125	14.84	81
3547590	5066903	77	2	2	No	0	Yes	8	Yes	No	No	Crepitations	consolidation	left lower zone	34.125	4.383	12.41	39.27	89.59	28.32	31.61	15.48	311.7	11.67	88.8	1.99	1.87	7.22	0.12	30.304	0.679	0.637	2.463	0.042	161	23.58	133	4.79	136	9.84	142	10.28	127	13.11	149	27.63	124	16.96	93
1660561	5070325	63	2	2	Yes	9	Yes	8	No	Yes	Yes	Crepitations	consolidation	right upper zone	9.8	3.87	11.1	34.6	89.4	28.6	32	15.1	195	12.9	68.4	22	8.3	0.7	0.6	6.7	2.2	0.8	0.1	0.1	150	19	151	4.07	141	9.65	134	13.53	143	10.88	219	28.83	121	9.97	93
3505657	5055877	44	1	2	Yes	8	No	0	No	No	Yes	Decreased breath sounds	consolidation	left upper zone	11.1	2.76	9	27.4	99.2	32.7	32.9	16.3	177	10.1	80.5	11.7	7.6	0.1	0.1	8.9	1.3	0.8	0	0	160	20.69	143	4.16	131	9.2	128	13.32	130	11.25	180	28.83	127	12.65	88
3553856	5098919	41	2	2	Yes	9	No	0	No	No	Yes	Decreased breath sounds	pleural effusion	right lung	15.3	4.22	12.3	38.5	91.1	29.2	32	16.5	381	9.3	91.8	5	3	0.1	0.1	14.1	0.8	0.5	0	0	166	18.35	152	4.73	130	9.87	121	13.16	130	12.19	172	27.08	135	12.18	88
3553155	5094999	28	2	2	Yes	8	Yes	8	Yes	No	No	Ronchi	consolidation	left middle zone	6.3	3.89	9.2	31	79.6	23.6	29.7	17.1	145	11.6	71.9	21	6.9	0	0.2	4.5	1.3	0.4	0	0	156	18.9	155	5.59	135	11.03	129	13.87	134	13.14	170	29.51	131	12.72	93
2680759	5111671	48	1	2	No	0	Yes	8	No	No	Yes	Ronchi	consolidation	left middle zone	7.8	3.76	12.7	37.6	100	33.8	33.8	14.9	206	10	79	10.9	8.5	0.9	0.7	6.1	0.8	0.7	0.1	0.1	149	17.08	153	5.34	130	10.92	121	12.94	130	12.63	154	26.1	131	13.02	91
3442933	5109919	67	2	2	Yes	12	Yes	10	Yes	No	No	Ronchi	consolidation	left middle zone	6	3.95	12	37.2	94.2	30.5	32.3	14.7	166	11.7	82.5	6.8	9.8	0.6	0.3	4.9	0.4	0.6	0	0	158	18.08	158	5.78	130	10.88	128	12.93	127	13.78	149	27.15	138	13.65	88
3556753	5113475	28	1	2	Yes	9	No	0	No	No	No	Crepitations	consolidation	right upper zone	10.5	3.63	10.8	32.4	89.3	29.9	33.5	13.9	105	11.8	87.8	3.6	8.4	0	0.2	9.3	0.4	0.9	0	0	164	19	153	5.28	136	10.4	134	11.39	132	12.24	170	27.2	136	12.44	92
1859917	5113733	71	2	2	No	0	Yes	7	Yes	No	Yes	Crepitations	consolidation	left lung	38.3	4.16	10.2	33.4	80.3	24.5	30.5	16.9	207	10.2	93.6	2.5	3.8	0	0.1	35.8	1	1.5	0	0	171	29.62	150	7.27	132	12.79	131	15.31	127	14	160	28.11	138	16.41	76
3556122	5110012	42	2	2	Yes	8	Yes	8	Yes	Yes	No	Decreased breath sounds	pleural effusion	right lung	23.6	4.12	9.7	32.8	79.6	23.7	29.7	20.3	283	10.7	88.3	5.6	5.1	0.5	0.5	20.8	1.3	1.2	0.1	0.1	146	18.97	154	6.37	135	13.13	131	12.69	132	16.78	159	31.75	128	13.43	89
3552929	5093631	33	1	2	Yes	9	Yes	8	No	No	No	Ronchi	consolidation	left middle zone	25.9	4.25	10.2	33.4	78.7	23.9	30.4	17.9	530	8.3	93.4	1.6	4.8	0.1	0.1	24.2	0.4	1.2	0	0	160	21.06	156	4.9	133	9.61	126	12.11	132	11.41	164	26.21	137	13.78	89
3556982	5114948	58	1	2	Yes	9	No	0	No	No	Yes	Ronchi	consolidation	right upper zone	9.3	4.52	14.6	46.1	102	32.3	31.6	16.4	257	9.7	87.2	3.3	6.5	2.4	0.6	8.1	0.3	0.6	0.2	0.1	176	22.15	152	9.82	132	14.11	130	18.84	128	16.29	167	29.36	142	16.54	99
1343346	4826813	68	2	2	No	0	Yes	9	Yes	No	Yes	Crepitations	consolidation	Right middle + lower zone	8.248	4.409	12.21	37.6	85.27	27.69	32.47	14.01	199.8	10.98	69.98	11.47	13.61	4.38	0.56	5.772	0.946	1.123	0.361	0.046	153	20.14	145	5.09	134	11.04	135	10.63	130	14.96	145	30.2	130	15.43	87
[truncated: 55 more columns]
